# Supplementary material
Source: PubMed Central journal article supplement (PMC5071159)
Supplement: NIHMS806483-supplement-1.pdf [file NIHMS806483-supplement-1.pdf]

Supplementary Table 1

**GO terms enriched among genes upregulated in STAT5b-CA Treg versus control Treg cells**

|                                                                | GO ID   | FDR      | n   | x    |
|----------------------------------------------------------------|---------|----------|-----|------|
| <b>G-protein coupled receptor signaling pathway</b>            | 7186    | 3.88E-06 | 25  | 182  |
| regulation of locomotion                                       | 40012   | 1.11E-05 | 35  | 359  |
| regulation of cellular component movement                      | 51270   | 1.52E-05 | 34  | 356  |
| <b>regulation of cell motility</b>                             | 2000145 | 2.84E-05 | 31  | 326  |
| regulation of cell migration                                   | 30334   | 7.41E-05 | 29  | 308  |
| regulation of localization                                     | 32879   | 1.98E-04 | 68  | 1160 |
| positive regulation of locomotion                              | 40017   | 9.76E-04 | 20  | 194  |
| positive regulation of cell motility                           | 2000147 | 4.05E-03 | 18  | 183  |
| <b>signal transduction</b>                                     | 7165    | 1.33E-05 | 94  | 1650 |
| single organism signaling                                      | 44700   | 1.52E-05 | 96  | 1729 |
| signaling                                                      | 23052   | 1.52E-05 | 96  | 1732 |
| cell communication                                             | 7154    | 1.67E-05 | 98  | 1790 |
| response to stimulus                                           | 50896   | 1.83E-05 | 146 | 3086 |
| cellular response to stimulus                                  | 51716   | 2.86E-03 | 115 | 2509 |
| <b>single-organism process</b>                                 | 44699   | 1.52E-05 | 241 | 5993 |
| single-organism cellular process                               | 44763   | 1.98E-04 | 215 | 5311 |
| <b>regulation of cell proliferation</b>                        | 42127   | 1.72E-05 | 53  | 743  |
| positive regulation of cell proliferation                      | 8284    | 7.53E-04 | 32  | 408  |
| immune system process                                          | 2376    | 2.92E-05 | 59  | 892  |
| <b>immune response</b>                                         | 6955    | 8.40E-04 | 33  | 431  |
| <b>cell surface receptor signaling pathway</b>                 | 7166    | 5.11E-05 | 52  | 755  |
| <b>regulation of multicellular organismal process</b>          | 51239   | 7.21E-04 | 67  | 1183 |
| biological adhesion                                            | 22610   | 5.04E-04 | 31  | 379  |
| <b>cell adhesion</b>                                           | 7155    | 2.14E-03 | 29  | 372  |
| regulation of cell adhesion                                    | 30155   | 2.41E-03 | 27  | 336  |
| cell-substrate adhesion                                        | 31589   | 4.39E-03 | 10  | 63   |
| <b>regulation of response to wounding</b>                      | 1903034 | 4.53E-03 | 17  | 169  |
| <b>organ development</b>                                       | 48513   | 4.05E-03 | 64  | 1189 |
| <b>negative regulation of multicellular organismal process</b> | 51241   | 2.67E-03 | 34  | 481  |
| positive regulation of cellular process                        | 48522   | 2.43E-03 | 116 | 2522 |
| <b>positive regulation of biological process</b>               | 48518   | 2.86E-03 | 129 | 2899 |

n = number of enriched genes

x = total number of genes in GO term gene set

**bold** = term shown in Fig. 5f.

Thick black borders demarcate terms that were manually grouped together in Fig. 5f.

**GO terms enriched among genes downregulated in STAT5bCA Treg versus control Treg cells**

|                                                         | GO ID   | FDR      | n   | x    |
|---------------------------------------------------------|---------|----------|-----|------|
| regulation of multicellular organismal process          | 51239   | 2.43E-05 | 69  | 1183 |
| regulation of multicellular organismal development      | 2000026 | 2.78E-05 | 52  | 799  |
| regulation of developmental process                     | 50793   | 9.86E-05 | 61  | 1077 |
| <b>regulation of cell differentiation</b>               | 45595   | 1.63E-04 | 47  | 761  |
| positive regulation of multicellular organismal process | 51240   | 1.90E-04 | 43  | 672  |
| positive regulation of developmental process            | 51094   | 1.41E-03 | 35  | 565  |
| response to stimulus                                    | 50896   | 2.78E-05 | 134 | 3086 |
| single organism signaling                               | 44700   | 2.01E-04 | 83  | 1729 |
| <b>signal transduction</b>                              | 7165    | 2.01E-04 | 80  | 1650 |
| signaling                                               | 23052   | 2.01E-04 | 83  | 1732 |
| cell communication                                      | 7154    | 2.01E-04 | 85  | 1790 |
| cellular response to stimulus                           | 51716   | 1.22E-03 | 105 | 2509 |
| <b>immune response</b>                                  | 6955    | 2.96E-05 | 35  | 431  |
| response to external stimulus                           | 9605    | 8.67E-05 | 44  | 656  |
| defense response to other organism                      | 98542   | 1.38E-04 | 19  | 169  |
| response to biotic stimulus                             | 9607    | 6.56E-04 | 26  | 333  |
| response to other organism                              | 51707   | 7.22E-04 | 25  | 318  |
| response to external biotic stimulus                    | 43207   | 7.22E-04 | 25  | 318  |
| defense response                                        | 6952    | 7.94E-04 | 30  | 428  |
| immune system process                                   | 2376    | 9.16E-04 | 49  | 892  |
| multi-organism process                                  | 51704   | 9.60E-04 | 44  | 768  |
| system development                                      | 48731   | 7.12E-05 | 84  | 1669 |
| single-multicellular organism process                   | 44707   | 1.09E-04 | 106 | 2344 |
| multicellular organismal development                    | 7275    | 1.11E-04 | 93  | 1968 |
| anatomical structure development                        | 48856   | 1.90E-04 | 93  | 2008 |
| multicellular organismal process                        | 32501   | 2.51E-04 | 106 | 2422 |
| cellular developmental process                          | 48869   | 7.94E-04 | 74  | 1557 |
| <b>cell differentiation</b>                             | 30154   | 2.46E-03 | 68  | 1456 |
| single-organism developmental process                   | 44767   | 3.36E-03 | 96  | 2302 |
| developmental process                                   | 32502   | 4.40E-03 | 96  | 2320 |
| anatomical structure morphogenesis                      | 9653    | 1.09E-04 | 55  | 936  |
| <b>tissue development</b>                               | 9888    | 8.04E-04 | 40  | 661  |
| organ development                                       | 48513   | 1.00E-03 | 60  | 1189 |
| epithelium development                                  | 60429   | 3.88E-03 | 27  | 409  |
| tissue morphogenesis                                    | 48729   | 4.79E-03 | 20  | 261  |
| <b>response to chemical</b>                             | 42221   | 1.95E-04 | 69  | 1337 |
| cellular response to organic substance                  | 71310   | 7.22E-04 | 42  | 703  |
| cellular response to chemical stimulus                  | 70887   | 8.86E-04 | 49  | 890  |
| response to organic substance                           | 10033   | 1.55E-03 | 52  | 997  |
| negative regulation of biological process               | 48519   | 2.97E-04 | 105 | 2402 |
| <b>regulation of cellular process</b>                   | 50794   | 1.03E-03 | 176 | 4832 |
| <b>nervous system development</b>                       | 7399    | 4.35E-04 | 50  | 879  |
| generation of neurons                                   | 48699   | 1.80E-03 | 37  | 621  |
| regulation of nervous system development                | 51960   | 2.97E-03 | 26  | 379  |
| neurogenesis                                            | 22008   | 3.36E-03 | 38  | 668  |
| <b>response to hormone</b>                              | 9725    | 6.56E-04 | 23  | 272  |
| <b>cell projection morphogenesis</b>                    | 48858   | 6.99E-04 | 23  | 274  |
| cell part morphogenesis                                 | 32990   | 1.22E-03 | 23  | 293  |
| cell projection organization                            | 30030   | 1.33E-03 | 30  | 447  |
| <b>sensory perception</b>                               | 7600    | 7.22E-04 | 15  | 130  |
| <b>G-protein coupled receptor signaling pathway</b>     | 7186    | 7.22E-04 | 18  | 182  |
| <b>defense response to bacterium</b>                    | 42742   | 9.60E-04 | 11  | 75   |
| <b>cell surface receptor signaling pathway</b>          | 7166    | 1.22E-03 | 43  | 755  |
| <b>positive regulation of immune system process</b>     | 2684    | 2.90E-03 | 26  | 378  |

n = number of enriched genes

x = total number of genes in GO term gene set

**bold** = term shown in Supplementary Fig. 6c.

Thick black borders demarcate terms that were manually grouped together in Supplementary Fig. 6c.

**Supplementary Table 2**

Antibody list

| <b>Antibody</b>        | <b>Clone</b>    | <b>Fluorescein, Dilution</b>                             | <b>Manufacturer</b> |
|------------------------|-----------------|----------------------------------------------------------|---------------------|
| B220                   | RA3-6B2         | PE-TexasRed, 1:500                                       | BD Biosciences      |
| CD103                  | 2E7             | PE, 1:500,                                               | eBioscience         |
| CD11b                  | M1770           | APC-eFluor780, 1:300                                     | Tonbo Biosciences   |
| CD11c                  | N418            | PE-Cy7, 1:500                                            | eBioscience         |
| CD122                  | 5H4             | PE, 1:200                                                | eBioscience         |
| CD127                  | A7R34           | PE, 1:200; PerCP-Cy5.5, 1:200                            | eBioscience         |
| CD132                  | TUGm2           | PE, 1:200; APC, 1:200                                    | BD Biosciences      |
| CD25                   | PC61            | PE, 1:400; PE-Cy7, 1:500; APC, 1:300                     | eBioscience         |
| CD3                    | 17A2            | eFluor450, 1:200; PerCP-Cy5.5, 1:300                     | eBioscience         |
| CD4                    | RM4-5           | PE-eFluor610, 1:500                                      | eBioscience         |
| CD44                   | IM7             | PE, 1:500; eFluor450 1:300                               | eBioscience         |
| CD45                   | 30-F11          | Alexa700, 1:400                                          | eBioscience         |
| CD62L                  | MEL-14          | APC, 1:300                                               | eBioscience         |
| CD69                   | H1.2F3          | APC, 1:300                                               | eBioscience         |
| CD8                    | 5H10            | BV605, 1:300                                             | BioLegend           |
| CD80                   | 16-10A1         | APC, 1:300; PE, 1:500                                    | eBioscience         |
| CD86                   | GL1             | APC, 1:300; PE, 1:500                                    | eBioscience         |
| CTLA-4                 | UC10-4B9        | PE, 1:300; APC, 1:300                                    | eBioscience         |
| Foxp3                  | FJK-16s         | eFluor450, 1:200, FITC, 1:300; PE-Cy7, 1:500; APC, 1:300 | eBioscience         |
| GITR                   | DTA-1           | eFluor450, 1:300; APC, 1:500                             | eBioscience         |
| Gr-1                   | RB6-8C5         | PE, 1:400                                                | BD Biosciences      |
| ICOS                   | 7E.17G9         | eFluor450, 1:200; PE, 1:400                              | eBioscience         |
| IFN- $\gamma$          | XMG1.2          | PE, 1:500                                                | Tonbo Biosciences   |
| IL-13                  | eBio13A         | PE, 1:300                                                | eBioscience         |
| IL-17                  | eBio17B7        | APC, 1:300                                               | eBioscience         |
| IL-4                   | 11B11           | PE, 1:300; APC, 1:300                                    | eBioscience         |
| Ki-67                  | B56             | PE, 1:400                                                | BioLegend           |
| KLRG1                  | 2F1             | APC, 1:300                                               | eBioscience         |
| MHC Class II (I-A/I-E) | M5/114.15.2     | eFluor450, 1:1000                                        | eBioscience         |
| pY-STAT5               | 47/Stat5(pY694) | Alexa647, 1:100                                          | BD Biosciences      |
| TCR $\beta$            | H57-597         | PerCP-Cy5.5, 1:200                                       | BioLegend           |
| TNF $\alpha$           | MP6-XT22        | PE-Cy7, 1:500; PE, 1:500                                 | BD Biosciences      |
| V $\beta$ 10b          | B21.5           | FITC, 1:50                                               | BD Biosciences      |
| V $\beta$ 11           | RR3-15          | FITC, 1:50                                               | BD Biosciences      |
| V $\beta$ 12           | MR11-1          | FITC, 1:50                                               | BD Biosciences      |
| V $\beta$ 13           | MR12-3          | FITC, 1:50                                               | BD Biosciences      |
| V $\beta$ 14           | 14-2            | FITC, 1:50                                               | BD Biosciences      |
| V $\beta$ 2            | B20.6           | FITC, 1:50                                               | BD Biosciences      |
| V $\beta$ 3            | KJ25            | FITC, 1:50                                               | BD Biosciences      |
| V $\beta$ 4            | KT4             | FITC, 1:50                                               | BD Biosciences      |
| V $\beta$ 5.1, 5.2     | MR9-4           | FITC, 1:50                                               | BD Biosciences      |
| V $\beta$ 6            | RR4-7           | FITC, 1:50                                               | BD Biosciences      |
| V $\beta$ 7            | TR310           | FITC, 1:50                                               | BD Biosciences      |
| V $\beta$ 8.1, 8.2     | MR5-2           | FITC, 1:50                                               | BD Biosciences      |
| V $\beta$ 8.3          | 1B3.3           | FITC, 1:50                                               | BD Biosciences      |
| V $\beta$ 9            | MR10-2          | FITC, 1:50                                               | BD Biosciences      |
